# Supplementary material
Source: PubMed Central journal article supplement (PMC7989140)
Supplement: DS_10.1177_0022034520965141.pdf [file DS_10.1177_0022034520965141.pdf]

## **mTOR Inhibition Ablates Cisplatin-induced Stemness in Mucoepidermoid Carcinoma**

Takafumi Nakano, Kristy A. Warner, Alexandra E Oklejas, Zhaocheng Zhang, Christie Rodriguez-Ramirez, Andrew G. Shuman, Jacques E. Nör

### **Materials and Methods**

#### **Cell lines**

We used human salivary gland MEC lines (UM-HMC-1, UM-HMC-3A, UM-HMC-3B), passages 85-90, generated and characterized in our laboratory for these studies (Warner et al. 2013). The salivary gland medium consisting of DMEM (Gibco; Waltham, MA, USA), 10% FBS (Gibco), 1% L-Glutamine (Gibco), 1% Antibiotic-Antimycotic (Gibco), 400 ng/mL hydrocortisone (Sigma Aldrich, St. Louis, MO, USA), 20 ng/mL epidermal growth factor (Sigma), and 5 µg/mL insulin (Sigma) was used to culture MEC cells, as described (Warner et al. 2013). Cell line authenticity was verified by short tandem repeat (STR) profiling performed in an independent commercial laboratory (Appendix Fig. 1).

#### **Sulforhodamine-B (SRB) Assay**

We used the SRB assay to evaluate the effect of mTOR pathway inhibitors on cell viability, as described (Skehan et al 1990). Briefly, the SRB reagent binds stoichiometrically to proteins under mild acidic conditions and then can be extracted using basic conditions. The amount of bound dye can be used as a proxy for cell density (i.e. compounded effect of treatment on cell proliferation and cell survival). Here, we seeded  $1 \times 10^3$  MEC cells/well in 96-well plates. The following day, cells were exposed to serial dilution concentrations of Buparlisib (Selleckchem; Houston, TX, USA), temsirolimus (Selleckchem), AZD8055 (Selleckchem), or PF4708671 (Selleckchem) with or without cisplatin (Teva Pharmaceuticals; Parsippany, NJ, USA) for 24 to 72 hours in quadruplicate wells per condition. Cells were fixed and stained for the SRB assay, as shown (Nör et al. 2014). Here, and throughout this manuscript, studies were independently repeated at least 3 times to ensure reproducibility of the data.

### **Salisphere Assay**

Non-adherent spheroids (named salispheres) were generated with salivary MEC cell lines, as we shown (Adams et al. 2015; Krishnamurthy and Nör 2013). Cells were counted, seeded in triplicate wells ( $2 \times 10^3$  cells/well) of 6-well ultra-low attachment plates (Corning; Corning, NY, USA), and cultured with the salisphere culture medium consisting of DMEM-F12 (Invitrogen; Carlsbad, CA, USA), 1% Glutamax (Gibco), 1% Antibiotic-Antimycotic (Gibco), 1% N2 Supplement (Gibco), 20 ng/mL epidermal growth factor (Sigma), 20 ng/mL basic fibroblast growth factor (Sigma), 10  $\mu$ g/mL insulin (Sigma), and 1  $\mu$ M dexamethasone (Sigma). After 24 hours, we treated cells with serial dilution concentrations of temsirolimus and/or cisplatin or Bmi-1 inhibitor (PTC-209; Tocris Bioscience, Bristol, UK) for 8 days. Then, we measured the size and the number of salispheres, *i.e.* floating spheroids of  $\geq 50$  cells.

### **Flow cytometry**

MEC cancer stem-like cells (CSCs) are characterized by high ALDH activity and high CD44 expression (Adams et al. 2015). Single cell suspensions were generated either from trypsinization of UM-HMC cell lines or digestion of tumor tissues, as shown (Adams et al. 2015). Cells were immersed with Aldefluor® substrate (StemCell Technologies; Vancouver, BC, Canada) or ALDH inhibitor diethylaminobenzaldehyde (DEAB) for 40 minutes at 37°C. Then, we washed and immersed cells with anti-human CD44 antibody (APC; BD Pharmingen; Franklin Lakes, NJ, USA) for 30 minutes at 4°C. We analyzed 100,000 DAPI-negative cells to determine ALDH activity and CD44 expression using flow cytometry. Data were analyzed from triplicate wells per condition.

### **MEC Patient-Derived Xenograft (PDX) model**

To generate MEC PDX (UM-HMC-PDX-18), we subcutaneously transplanted fragments of the UM-HMC-18 tumor (*in vivo* passage 5) in the dorsal region of severe combined immunodeficient (SCID, CB-17; Charles River; Wilmington, MA, USA) male mice. Tumor volume was measured using the formula: volume ( $\text{mm}^3$ ) =  $L \times W^2/2$  (L, length; W, width). When mean tumor volume

reached 460 mm<sup>3</sup>, we randomly allocated mice into 6 groups, as follows: 1) PBS daily via intraperitoneal (i.p.) injection (placebo control, n=6); 2) 5 mg/kg temsirolimus (Sigma Aldrich) daily via i.p. injection (n=6); 3) 5 mg/kg cisplatin (Sigma Aldrich) weekly via i.p. injection (n=6); 4) 5 mg/kg temsirolimus daily + 5 mg/kg cisplatin weekly (both drugs started at the same time, n=8); 5) 5 mg/kg temsirolimus daily + 5 mg/kg cisplatin weekly (temsirolimus started 1 week before cisplatin, n=8); 6) 5 mg/kg cisplatin weekly + 5 mg/kg temsirolimus daily (cisplatin started 1 week before temsirolimus, n=6). After 10 days, we euthanized mice, retrieved PDX tumors and divided into 3 pieces (*i.e.* one for flow cytometry and two smaller pieces for western blots and histology). All *in vivo* experiments followed the ARRIVE (Animal Research: Reporting In Vivo Experiments) guidelines, and an animal protocol was reviewed and approved by the Institutional Animal Care and Use Committee (IACUC) of University of Michigan (approval number: PRO00007199).

### **Western Blot Analysis**

We plated UM-HMC-1, UM-HMC-3A, or UM-HMC-3B cell lines, serum starved overnight, and treated cells with 0-10  $\mu$ M temsirolimus, 0-1  $\mu$ M cisplatin, or 0.1  $\mu$ M temsirolimus together with 0.1  $\mu$ M cisplatin for 24 hours. We used Nonidet P-40 (NP-40; Sigma) buffer to prepare protein lysates from cell lines or UM-HMC-PDX-18 tissues and loaded protein lysates onto 9% SDS-PAGE gels. Membranes were immersed overnight at 4°C with one of the following primary antibodies: mouse anti-human phospho-mTOR Ser2448 (1:1000; Cell Signaling, Danvers, MA, USA), mouse anti-human mTOR (1:2000; Santa Cruz Biotechnology, Santa Cruz, CA, USA), mouse anti-human Raptor (1:500; Santa Cruz), mouse anti-human Rictor (1:500; Santa Cruz), rabbit anti-human phospho-S6K1 Thr421/Ser424 (1:2000; Cell Signaling), rabbit anti-human S6K1 (1:2000; Cell Signaling), rabbit anti-human phospho-AKT Ser473 (1:2000; Cell Signaling), rabbit anti-human AKT (1:50,000; Cell Signaling), rabbit anti-human Bmi-1 (1:10,000; Cell Signaling), or mouse anti-human GAPDH (1:40,000,000; Chemicon, Billerica, MA, USA). Membranes were exposed to affinity-purified secondary antibodies (1:2000) conjugated with

HRP (Jackson Laboratory). Immunoreactive proteins were visualized by SuperSignal West Pico chemiluminescent substrate (Thermo Fisher Scientific, Waltham, MA, USA).

### **Histological analyzes**

We deparaffinized and rehydrated by immersing formalin-fixed, paraffin-embedded tissue sections in xylene and descending concentrations of ethanol. For immunohistochemical and immunofluorescence staining, we performed antigen retrieval with Trypsin (Sigma Aldrich) at 37°C for 1 hour or with citrate buffer (Thermo Fisher Scientific) in a pressure cooker following manufacturer's instructions. Then, tissues were immersed with 0.1% triton X-100 (Fisher Scientific, Fair Lawn, NJ, USA) for 20-30 minutes, followed by 3% hydrogen peroxide (Fisher Scientific) for 20-30 minutes and Background Sniper (Biocare Medical, Patcheco, CA, USA) for 20-30 minutes at room temperature. Tissues were exposed to anti-human Pan-cytokeratin (1:200; Santa Cruz) or anti-F4/80 (macrophage) antibody (1:100; Abcam) overnight at 4°C. After incubation with primary antibody, tissues were treated with MACH13 (Biocare Medical) for 20 minutes at room temperature, MACH1 3 HRP polymer (Biocare Medical) for 20 minutes at room temperature, and then with DAB for 3 minutes. Hematoxylin (Vector Laboratories, Burlingame, CA, USA) was used to counterstain for 20-30 seconds. For immunofluorescence staining, tissues were immersed with anti-human ALDH1 (1:100; Abcam, Cambridge, England) and anti-human CD44 (1:400; Cell Signaling) overnight at room temperature. After incubation with primary antibodies, tissue sections were exposed to Alexafluor 488 (Anti-Rabbit; Invitrogen, San Diego, CA, USA) and Alexafluor 594 (Anti-Mouse; Invitrogen) for 1 hour at room temperature. Then, tissues sections were covered by cover slip using Vectashield with DAPI (Vector Laboratories, Burlingame, CA, USA). The number of ALDH-positive and CD44-positive cells was counted in randomly selected fields (5 per tumor). In selected experiments, specimens were also stained for Periodic Acid Schiff (PAS) (Sigma) following manufacturer's instructions. All images were taken with Nikon Eclipse E800 Fluorescence Microscope.

## **Statistical analysis**

We analyzed the impact of treatment on tumor volume, number and size of salispheres, cell viability, and CSC fraction using one-way ANOVA followed by appropriate post hoc test (Tukey test). Statistical significance was determined at  $P < 0.05$  throughout this manuscript.

## **References**

Krishnamurthy S, Nör JE. 2013. Orosphere assay: a method for propagation of head and neck cancer stem cells. *Head Neck*. 35(7):1015–1021.

Skehan P, Storeng R, Scudiero D, Monks A, McMahon J, Vistica D, Warren JT, Bokesch H, Kenney S, Boyd MR. 1990. New colorimetric cytotoxicity assay for anticancer-drug screening. *J Natl Cancer Inst*. 82(13):1107–1112.

Warner KA, Adams A, Bernardi L, Nor C, Finkel KA, Zhang Z, McLean SA, Helman J, Wolf GT, Divi V, et al. 2013. Characterization of tumorigenic cell lines from the recurrence and lymph node metastasis of a human salivary mucoepidermoid carcinoma. *Oral Oncol*. 49(11):1059–1066.

| <b>A</b> | Genetic locus | Cell line (UM-HMC-1, p# 2) | Cell line (UM-HMC-1, p# 88) |
|----------|---------------|----------------------------|-----------------------------|
|          | D3S1358       | 15, 16                     | 15, 16                      |
|          | D7S820        | 11, 12                     | 11, 12                      |
|          | vWA           | 16                         | 16                          |
|          | FGA           | 18.2, 20                   | 18.2, 20                    |
|          | D8S1179       | 15                         | 15                          |
|          | D21S11        | 30, 31                     | 30, 31                      |
|          | D18S51        | 12, 17                     | 12, 17                      |
|          | D5S818        | 10, 13                     | 10, 13                      |
|          | D13S317       | 12, 13                     | 12, 13                      |
|          | D16S539       | 11                         | 11                          |
|          | TH01          | 7, 9                       | 7, 9                        |
|          | TPOX          | 6, 9                       | 6, 9                        |
|          | CSF1PO        | 7, 11                      | 7, 11                       |
|          | AMEL          | X, Y                       | X, Y                        |
|          | Penta D       | 6, 13                      | 6, 13                       |
|          | Penta E       | 9, 10                      | 9, 10                       |

  

| <b>B</b> | Genetic locus | Tumor specimen (recurrence) | Cell line (UM-HMC-3A, p# 89) |
|----------|---------------|-----------------------------|------------------------------|
|          | D3S1358       | 14                          | 14                           |
|          | D7S820        | 8, 9                        | 8, 9                         |
|          | vWA           | 15                          | 15                           |
|          | FGA           | 10, 21                      | 10, 21                       |
|          | D8S1179       | 13                          | 13                           |
|          | D21S11        | 29, 32.2                    | 29, 32.2                     |
|          | D18S51        | 12, 16                      | 12, 16                       |
|          | D5S818        | 11, 12                      | 11, 12                       |
|          | D13S317       | 8, 11                       | 8, 11                        |
|          | D16S539       | 12, 13                      | 12, 13                       |
|          | TH01          | 8                           | 8, 9                         |
|          | TPOX          | 9, 12                       | 9, 12                        |
|          | CSF1PO        | 12                          | 12                           |
|          | AMEL          | X                           | X                            |
|          | Penta D       | 10, 14                      | 10, 14                       |
|          | Penta E       | 9, 17                       | 9, 17                        |

  

| <b>C</b> | Genetic locus | Tumor specimen (metastasis) | Cell line (UM-HMC-3B, p# 90) |
|----------|---------------|-----------------------------|------------------------------|
|          | D3A1358       | 14                          | 14                           |
|          | D7S820        | 8, 9                        | 8, 9                         |
|          | vWA           | 15                          | 15                           |
|          | FGA           | 10, 21                      | 10, 21                       |
|          | D8S1179       | 13                          | 13                           |
|          | D21S11        | 29, 32.2                    | 29, 32.2                     |
|          | D18S51        | 12, 16                      | 12, 16                       |
|          | D5S818        | 11, 12                      | 11, 12                       |
|          | D13S317       | 11                          | 8, 11                        |
|          | D16S539       | 12, 13                      | 12, 13                       |
|          | TH01          | 8, 9                        | 8, 9                         |
|          | TPOX          | 9, 12                       | 9, 12                        |
|          | CSF1PO        | 12                          | 12                           |
|          | AMEL          | X                           | X                            |
|          | Penta D       | 10, 14                      | 10, 14                       |
|          | Penta E       | 9, 17                       | 9, 17                        |

**Appendix Fig. 1.** Genotypic match of the UM-HMC cell lines used in this study. **A**, Table depicting the short tandem repeat (STR) profile of UM-HMC-1 (passage 1) against UM-HMC-1 cells used here (passage 89). **B**, Table depicting the STR profile of the human MEC specimen and the UM-HMC-3A cell line (passage 89). **C**, Table depicting the STR profile of the human MEC specimen and the UM-HMC-3B cell line used here (passage 90).

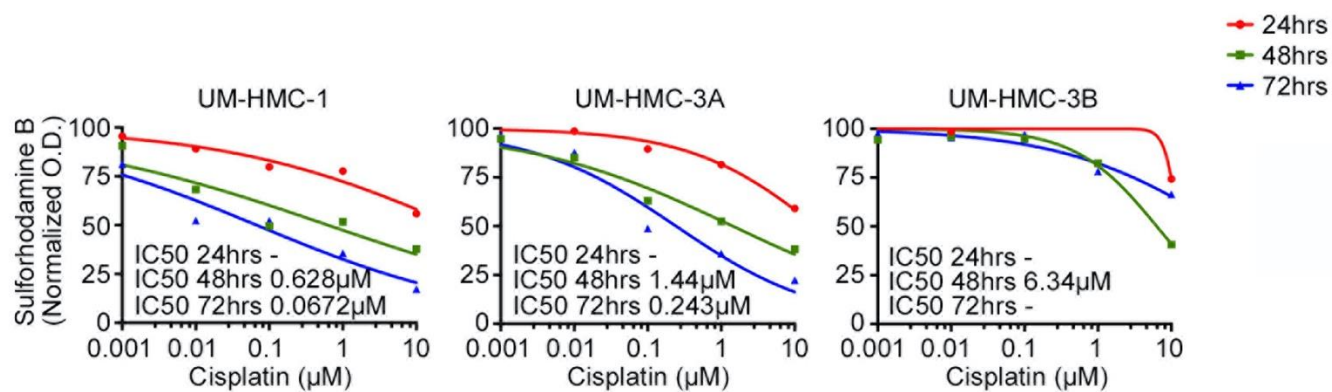

**Appendix Fig. 2.** Effect of cisplatin on bulk MEC cell viability. The cytotoxicity of cisplatin after 24, 48, and 72 hours was evaluated by the SRB assay in UM-HMC-1, UM-HMC-3A, and UM-HMC-3B cell lines. Data were normalized against vehicle control, and is derived from triplicate wells per condition.

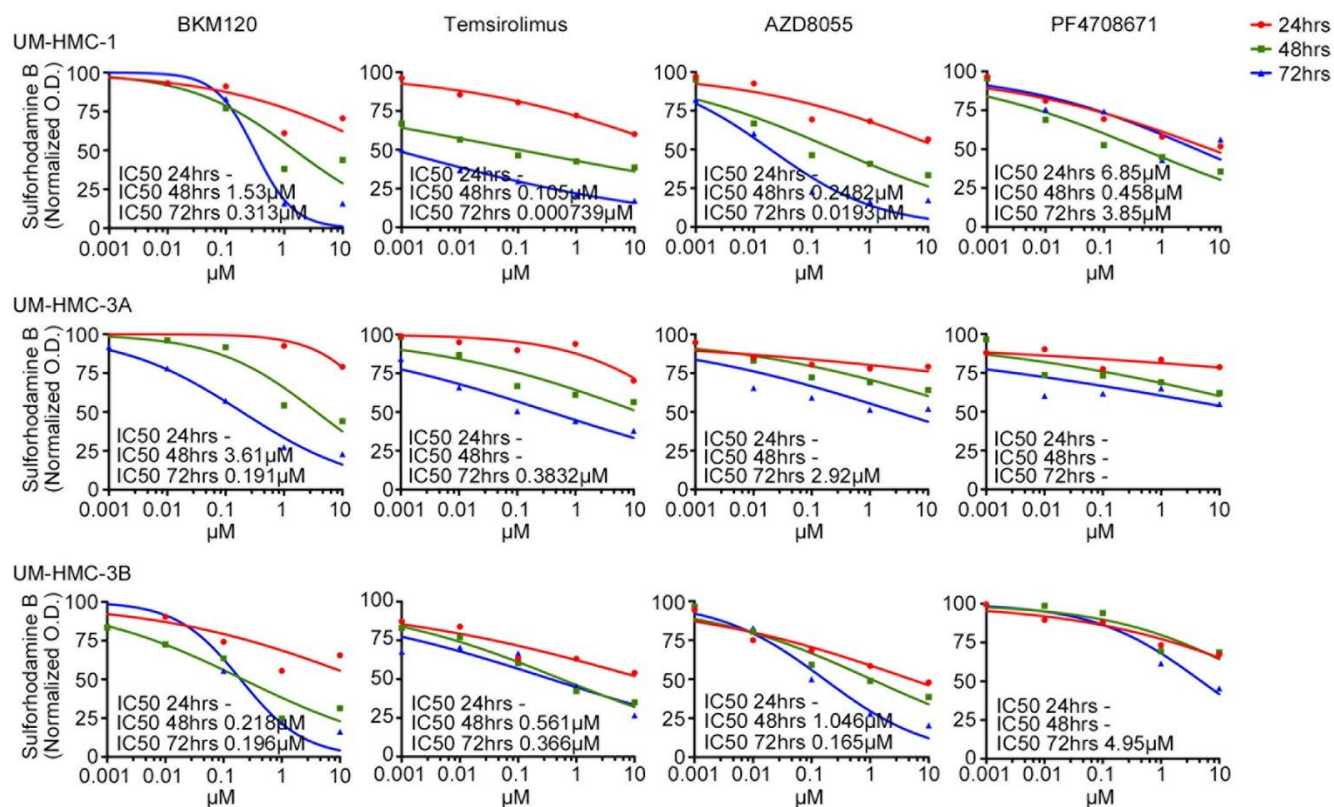

**Appendix Fig. 3.** Effect of mTOR inhibitors on bulk MEC cell viability. The cytotoxicity of mTOR pathway inhibitors (BKM120, temsirolimus, AZD8055, PF4708671) after 24, 48, or 72 hours was evaluated by the SRB assay in UM-HMC-1, UM-HMC-3A, and UM-HMC-3B cell lines. Data were normalized against vehicle control, and is derived from triplicate wells per condition.

| Cell line |                                |         |         |         |         |         |
|-----------|--------------------------------|---------|---------|---------|---------|---------|
| UM-HMC-1  | Temsirolimus ( $\mu\text{M}$ ) | 0.0001  | 0.001   | 0.01    | 0.1     | 1       |
|           | Cisplatin ( $\mu\text{M}$ )    | 1       | 1       | 1       | 1       | 1       |
|           | 24 hrs CI                      | 11.9774 | 0.70806 | 0.45914 | 0.63627 | 0.27484 |
|           | 48 hrs CI                      | 28.5475 | 0.99039 | 0.62213 | 0.44288 | 0.43365 |
|           | 72 hrs CI                      | 10.5819 | 0.60585 | 0.28996 | 0.24968 | 0.42646 |
| UM-HMC-3A | Temsirolimus ( $\mu\text{M}$ ) | 0.0001  | 0.001   | 0.01    | 0.1     | 1       |
|           | Cisplatin ( $\mu\text{M}$ )    | 1       | 1       | 1       | 1       | 1       |
|           | 24 hrs CI                      | 18.4491 | 1.36374 | 0.41465 | 0.3882  | 0.25291 |
|           | 48 hrs CI                      | 436.529 | 13.8867 | 1.03811 | 0.6681  | 0.7469  |
|           | 72 hrs CI                      | 12.1631 | 2.98133 | 1.89234 | 0.87426 | 0.67665 |

**Appendix Fig. 4.** Combination index (CI)-isobologram method that allows quantitative determination of drug interactions, where  $\text{CI} < 1$ ,  $= 1$ , and  $> 1$  indicate synergism, additive effect, and antagonism (respectively). This method was used to quantify the impact of combination 0.0001-1  $\mu\text{M}$  temsirolimus and 1  $\mu\text{M}$  cisplatin on MEC cell viability (UM-HMC-1, UM-HMC-3A).

## UM-HMC-3A

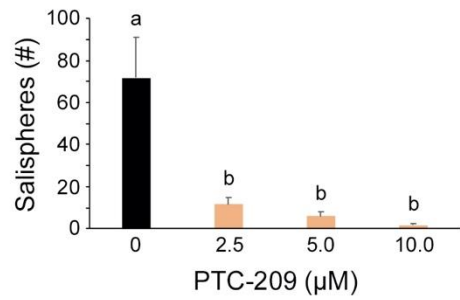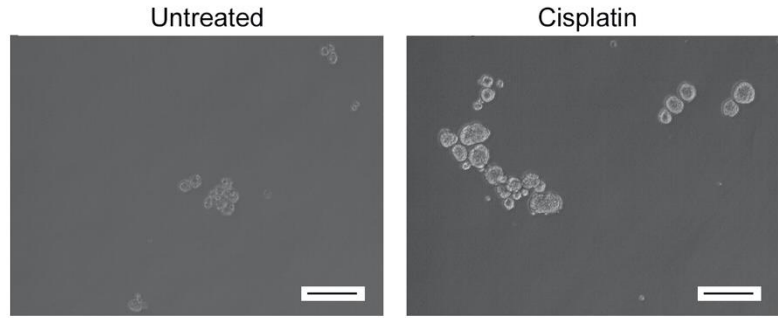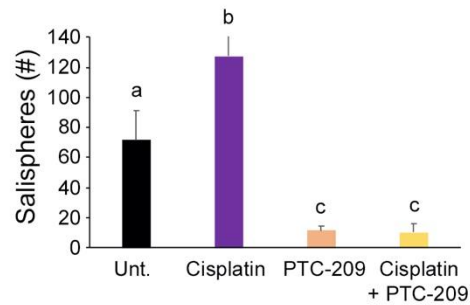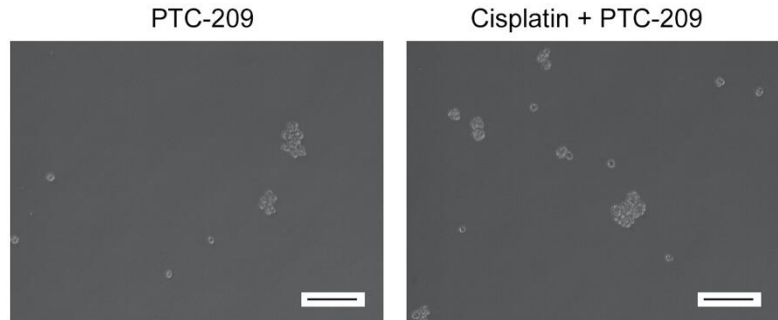

## UM-HMC-3B

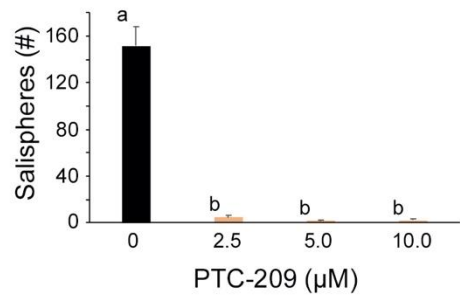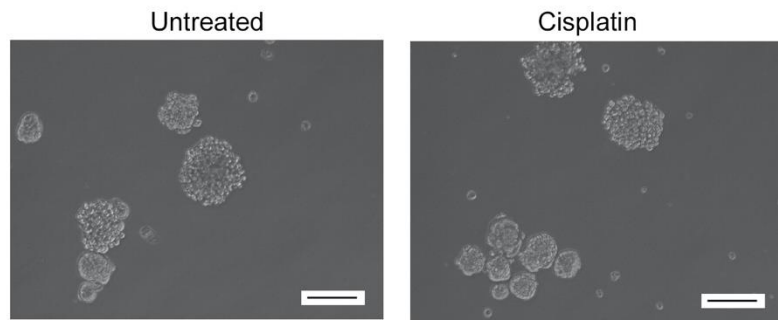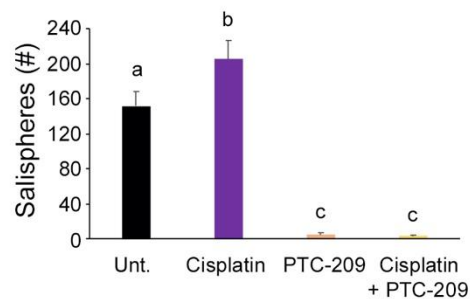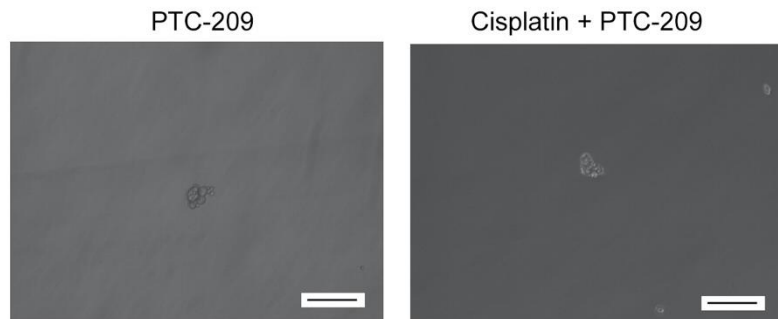

**Appendix Fig. 5.** Effect of Bmi-1 inhibitor (PTC-209) and/or cisplatin on salispheres. Bar graphs illustrate the number of salispheres per well generated from UM-HMC-3A and UM-HMC-3B cells treated with 0-10 μM PTC-209 (top graphs) or 2.5 μM PTC-209 and/or 0.1 μM cisplatin (bottom graphs). Representative photographs of salispheres after treatment with cisplatin (0.1 μM) and/or PTC-209 (2.5 μM). Scale bars represent 100 μm (x100). Different lowercase letters in graphs represent statistical significance at  $P < 0.05$ .

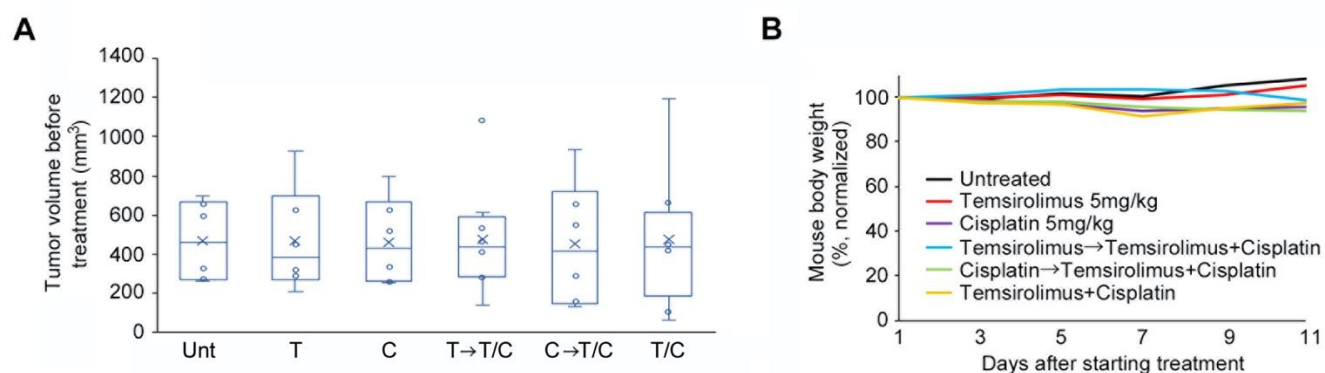

**Appendix Fig. 6.** Effect of temsirolimus and/or cisplatin on tumor growth in MEC PDX model. **A**, Tumor volume before start of treatment: Untreated (Unt.), temsirolimus (T), cisplatin (C), temsirolimus first combination therapy (T → T/C), cisplatin first combination therapy (C → T/C), and temsirolimus and cisplatin at same time (T/C). The average tumor volumes in each treatment group were between 451.2 to 476.6 mm<sup>3</sup>. **B**, Graph depicting mouse body weight during treatment. Data were normalized against body weight before starting treatment. UM-HMC-PDX-18 tumors treated with PBS (Untreated, black), temsirolimus (red), cisplatin (purple), temsirolimus first combination therapy (light blue), cisplatin first combination therapy (green), or temsirolimus and cisplatin at same time (yellow).

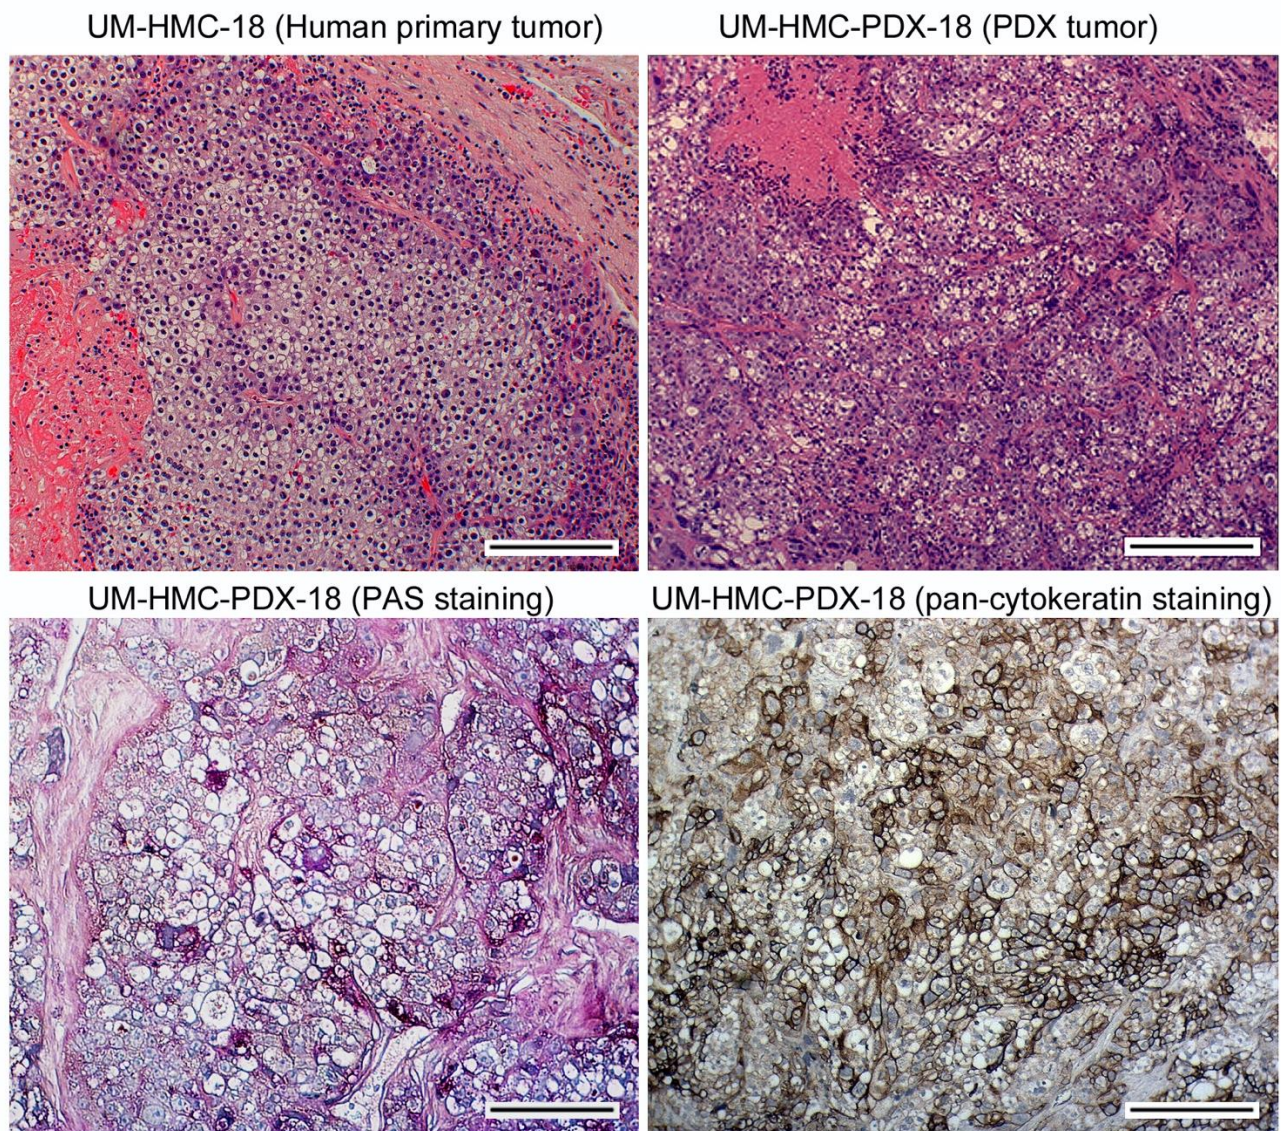

**Appendix Fig. 7.** UM-HMC-PDX-18 tumors retain the histological features of the primary human tumor. Representative histological sections (HE) of the human primary tumor (UM-HMC-18) from which the UM-HMC-PDX-18 xenograft tumors were generated. The PDX tumors were also stained with PAS (lower left) and pan-cytokeratin (lower right). Scale bars represent 100  $\mu\text{m}$  (x100).

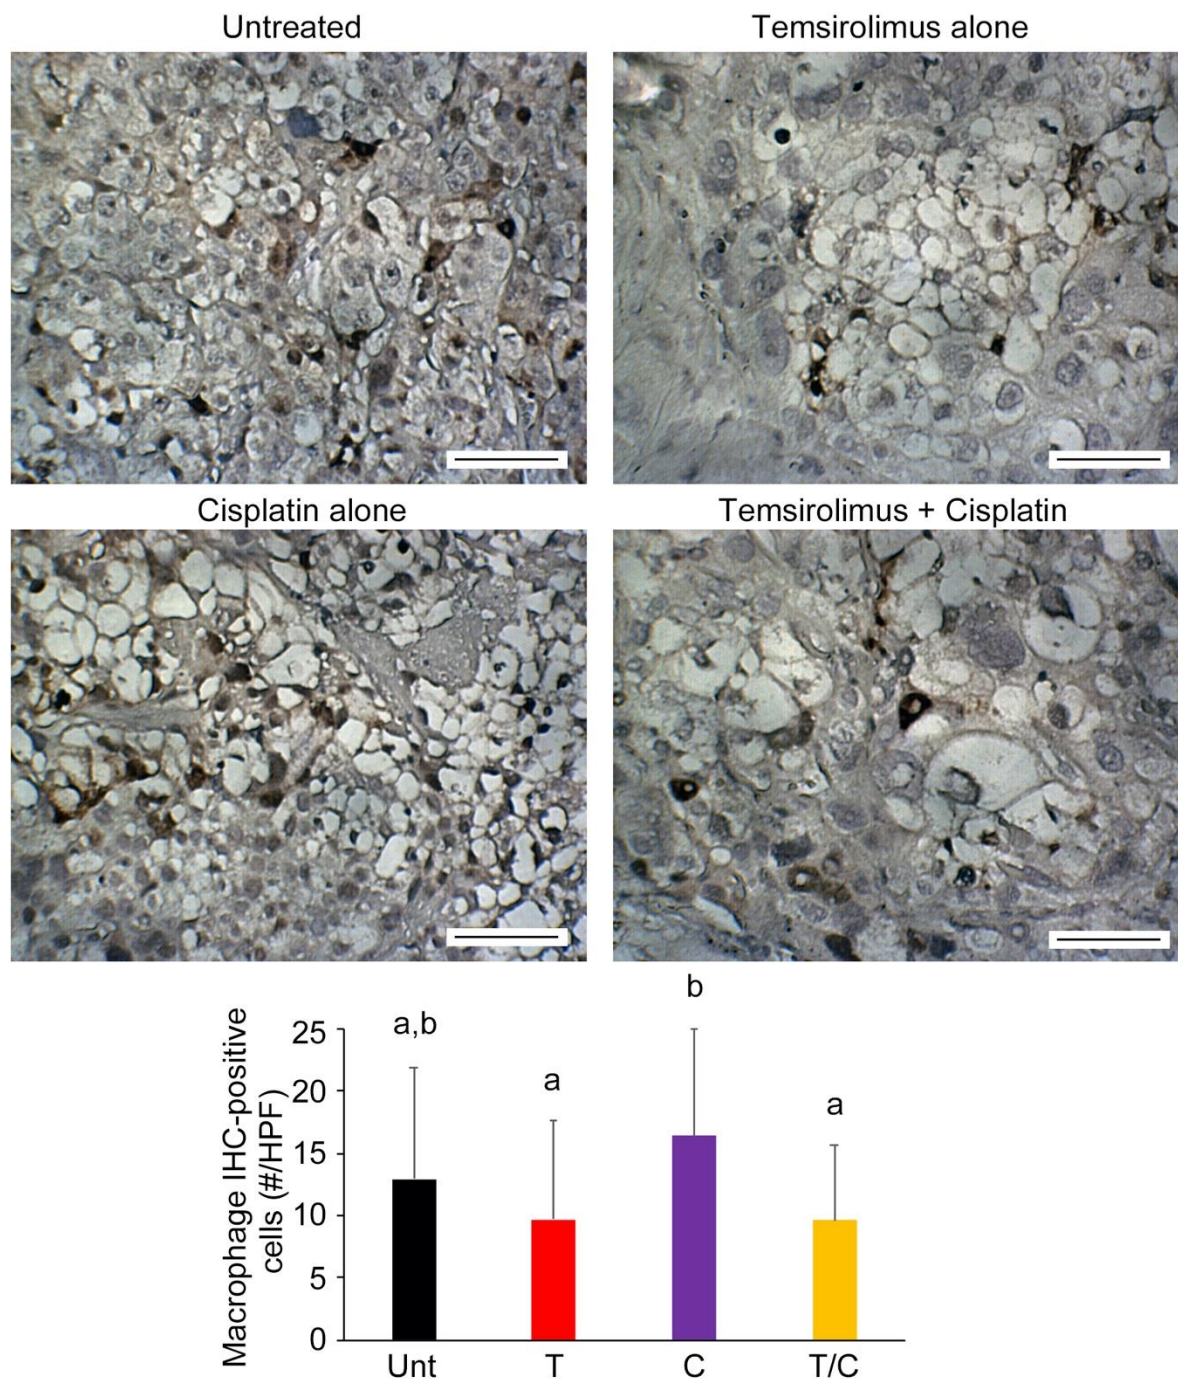

**Appendix Fig. 8.** Representative photomicrographs of UM-HMC-PDX-18 tumor tissue sections upon immunohistochemical staining for macrophages (anti-F4/80 antibody). Images were taken at 400x magnification. Scale bars represent 50  $\mu\text{m}$ . Bar graph illustrating the number of positive cells for macrophage per high power field (HPF: 400X magnification) in tissues treated with temsirolimus (red), cisplatin (purple), or temsirolimus and cisplatin at same time (yellow). Different lowercase letters in graphs represent statistical significance at  $P < 0.05$ .

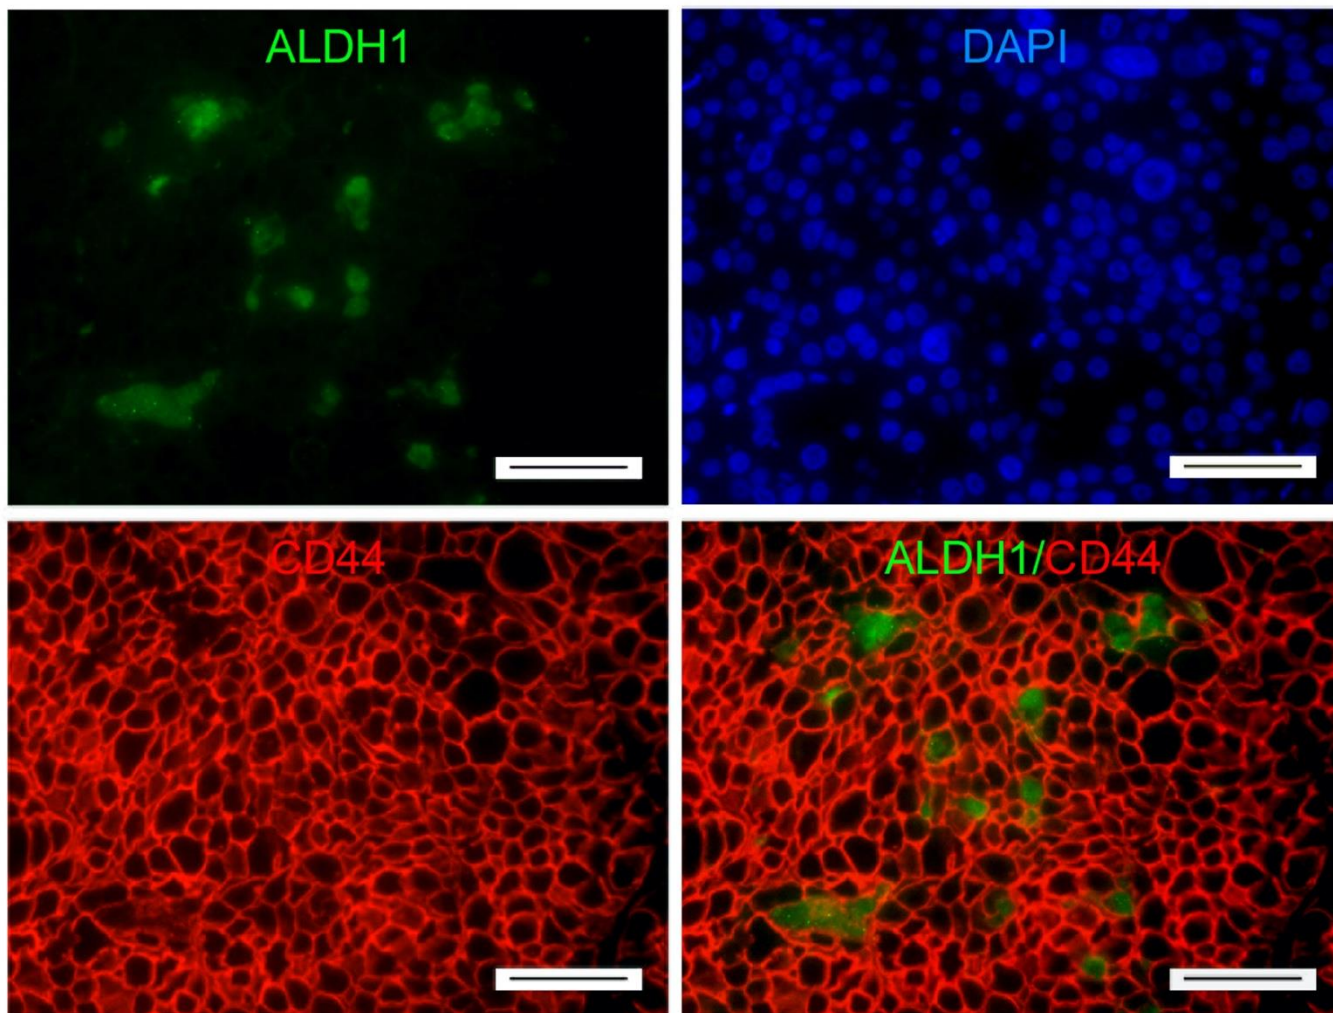

**Appendix Fig. 9.** Representative photomicrographs of immunofluorescence staining of UM-HMC-PDX-18 tumor tissue sections stained for ALDH1 (green), CD44 (red), and DAPI (blue). Images were taken at 400x magnification. Scale bars represent 50  $\mu$ m.
